# Supplementary material
Source: publisher figshare collection journal article supplement (https://gsapubs.figshare.com/articles/dataset/_/14143943)
Supplement: Supplementary file 1 [file 1]

## Rotated Rigid Slats

Fig. D)

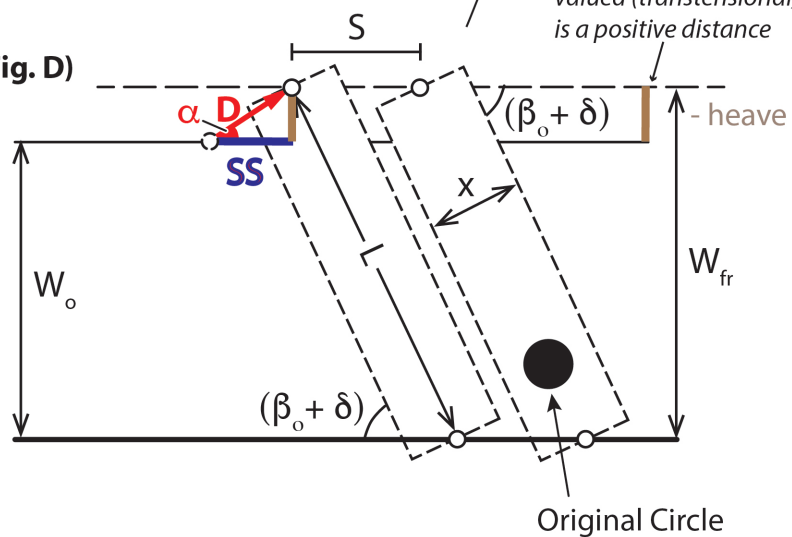

## Deformable Slats

(strike-slip case)

Fig. E)

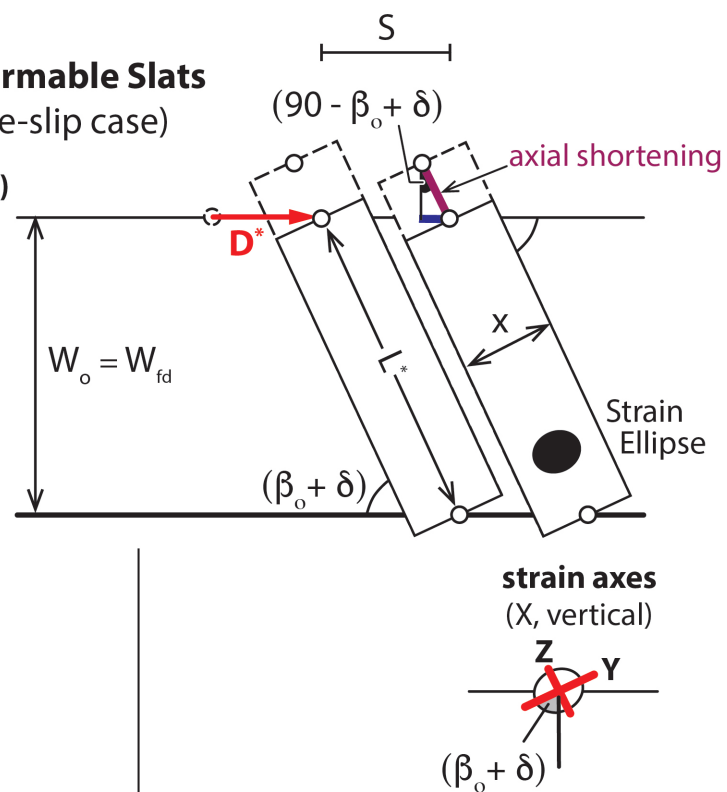

## Deformable Slats

(transpression)

Fig. F)

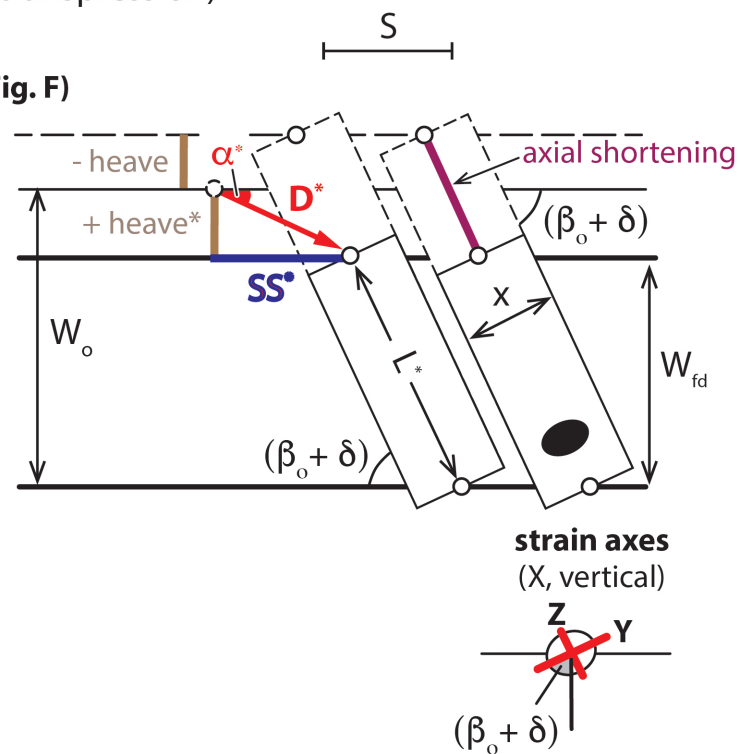

## Deformable Slat Model—generalized to transpression

$$(24) (W_o - W_{fd}) = \text{Heave}^* = D^* \times \sin(\alpha^*) \quad \text{See Fig. F}$$

$$(25) W_o = [D^* \times \sin(\alpha^*) + W_{fd}] \quad \text{See Fig. F.}$$

$$(26) W_{fd} / W_o = [W_{fd} / [D^* \times \sin(\alpha^*) + W_{fd}]] \quad \text{See Fig. F.} \quad \text{Stretch of the zone width}$$

equation 16 is replaced by

$$(27) L^* = W_{fd} / \sin(\beta_o + \delta) \quad \text{See Fig. F}$$

equation 18 is replaced by

$$(28) L^* / L = (1 + e_3) = [W_{fd} / W_o] \times [\sin(\beta_o) / \sin(\beta_o + \delta)] \quad \text{See Fig. F} \quad \text{Axial stretch of slat}$$

equation 17 is replaced by

$$(29) (L - L^*) = \quad \text{See Fig. F} \quad \text{Axial shortening of slat}$$

$$\{[W_o / W_{fd}] \times (W_{fd} / \sin(\beta_o + \delta)) \times (\sin(\beta_o + \delta) / \sin(\beta_o))\} - [W_{fd} / \sin(\beta_o + \delta)] \quad \text{Combine (27) and (28)}$$

equation 20 is replaced by

$$(30) (1 + e_1) = \sin(\beta_o + \delta) / \sin(\beta_o) \times W_o / W_{fd} \quad \text{See Fig. F}$$

equation 22 (stretch of strike-perpendicular line) is replaced by

$$(31) \text{stretch} = 1 / [(\sin((\beta_o + \delta) / \sin(\beta_o) \times (W_o / W_{df}))^2 \times \sin^2(\beta_o + \delta) + \cos^2(\beta_o + \delta))]^{-1/2}$$

$$(32) SS^* = D \cos \alpha + [\tan\{90 - (\beta_o + \delta)\} \times \{\text{Heave}^* - \text{Heave}\}] \quad \text{See Fig. F}$$

$$(33) SS^* = D \cos \alpha + [\tan\{90 - (\beta_o + \delta)\} \times \{[D^* \times \sin(\alpha^*)] - \text{Heave}\}] \quad \text{Insert (24)} \\ \text{(also, Eqns 9, 11, 13)}$$
