# Supplementary material
Source: publisher figshare collection journal article supplement (https://gsapubs.figshare.com/articles/dataset/_/14143943)
Supplement: Supplementary file 2 [file 1]

## Original Geometry

Fig. A)

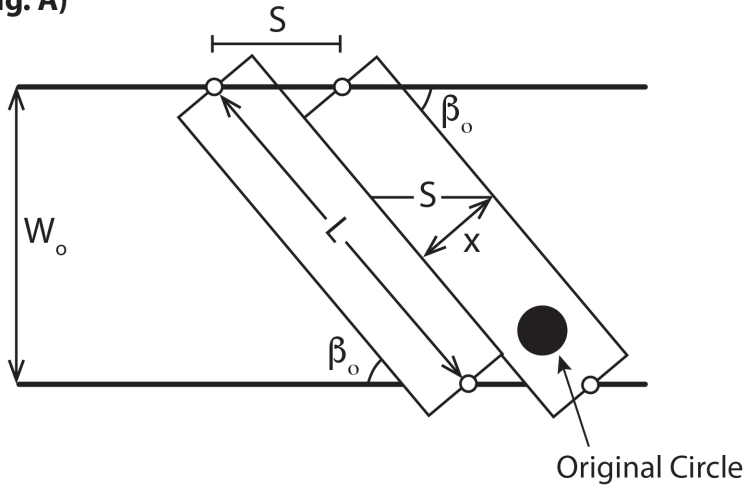

## Rotated Rigid Slats

Fig. B)

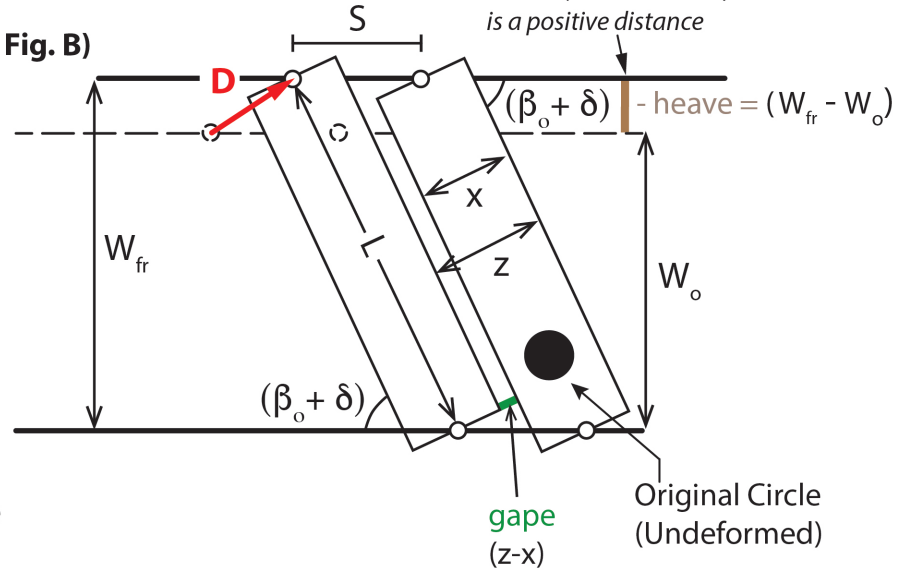

## Definition of Variables

|                      |                                                                                      |
|----------------------|--------------------------------------------------------------------------------------|
| $W_o$                | Original width of deformation zone                                                   |
| $W_{fr}$             | Post-rotation width of deformation zone (rigid slat case)                            |
| $W_{fd}$             | Final width of deformation zone (deformable slat case) = observed width in the field |
| $L$                  | Original length of slats                                                             |
| $L^*$                | Final length of slats (deformable slat case)                                         |
| $S$                  | Strike-parallel spacing of slats                                                     |
| $x$                  | Transverse width of slats (= original transverse spacing)                            |
| $z$                  | Transverse spacing of slats after deformation                                        |
| $\beta_o$            | Original strike angle of long dimension (axis) of slat                               |
| $\delta$             | Angular rotation of slat                                                             |
| $(\beta_o + \delta)$ | Final strike angle of long dimension (axis) of slat                                  |
| $D$                  | Displacement magnitude (rigid slat case)                                             |
| $\alpha$             | Displacement angle (rigid slat case, positive if convergent)                         |
| $D^*$                | Displacement magnitude (deformable slat case)                                        |
| $\alpha^*$           | Displacement angle (deformable slat case)                                            |
| $SS$                 | Strike-slip component of displacement (rigid slat case)                              |
| $SS^*$               | Strike-slip component of displacement (deformable slat case)                         |

$$\text{Heave} = (W_o - W_{fr})$$

= Zone width change (rigid slat case)

$$\text{Heave}^* = (W_o - W_{fd})$$

= Zone width change (deformable slat case)

Fig. C)

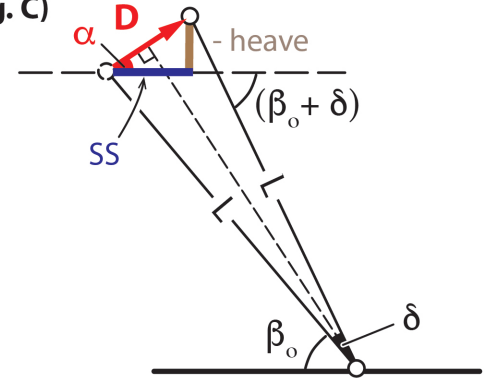

## Assumptions

1. Spacing ( $S$ ) of slats is constant (i.e., no length changes parallel to strike of deformation zone)
2. Transverse width ( $x$ ) of slats is constant
3. Volume of a slat is conserved (i.e., horizontal length stretch,  $L^*/L$ , is compensated by a vertical stretch,  $L/L^*$ )

# Rigid Slat Model

|                                                                                     |                               |                                              |
|-------------------------------------------------------------------------------------|-------------------------------|----------------------------------------------|
| (1) $L = W_o / \sin(\beta_o)$                                                       | See Fig. A                    |                                              |
| (2) $x = S \times \sin(\beta_o)$                                                    | See Fig. A                    |                                              |
| (3) $z = S \times \sin(\beta_o + \delta)$                                           | See Fig. B                    |                                              |
| (4) $W_{fr} = L \times \sin(\beta_o + \delta)$                                      | See Fig. B                    |                                              |
| (5) $W_{fr} = W_o \times [\sin(\beta_o + \delta) / \sin(\beta_o)]$                  | Substitute (1) into (4)       |                                              |
| (6) $W_{fr} / W_o = \sin(\beta_o + \delta) / \sin(\beta_o)$                         | Divide (5) by $W_o$           | Stretch of the zone width                    |
| (7) $z / x = \sin(\beta_o + \delta) / \sin(\beta_o)$                                | Divide (3) by (2)             | Bulk stretch transverse to the slats         |
| (8) $(z - x) = S \times [\sin(\beta_o + \delta) - \sin(\beta_o)]$                   | Subtract (2) from (3)         | Nominal gape between slats after deformation |
| (9) $(W_o - W_{fr}) = W_o \times [1 - [\sin(\beta_o + \delta) / \sin(\beta_o)]]$    | Subtract (5) from $W_o$       | <b>Heave</b> (positive if contractional)     |
| (10) $\sin(\delta/2) = (D \times L) / 2$                                            | See Fig. C                    |                                              |
| (11) $D = 2W_o \times \sin(\delta/2) / \sin(\beta_o)$                               | Combine (1) and (10)          |                                              |
| (12) $\delta = 2 \times \arcsin[D \times \sin(\beta_o) / 2W_o]$                     | Rearrange (11)                |                                              |
| (13) $\alpha = \arcsin[(W_o - W_{fr}) / D]$                                         | See Fig. C                    |                                              |
| (14) $\alpha = \arcsin[(\sin(\beta_o + \delta) - \sin(\beta_o)) / 2\sin(\delta/2)]$ | Insert (9) and (11) into (13) |                                              |
| (15) $SS = -1 \times \text{Heave} / \tan(\alpha)$                                   | See Fig. C, Eqn 9             |                                              |

# Deformable Slat Model—pure strike-slip case

|                                                                                                                                                                          |                                         |                                                               |
|--------------------------------------------------------------------------------------------------------------------------------------------------------------------------|-----------------------------------------|---------------------------------------------------------------|
| (16) $L^* = W_o / \sin(\beta_o + \delta)$                                                                                                                                | See Fig. E                              |                                                               |
| (17) $(L - L^*) = [W_o / \sin(\beta_o)] - [W_o / \sin(\beta_o + \delta)]$                                                                                                | Subtract (16) from (1)                  | Axial shortening of slat                                      |
| (18) $L^* / L = (1 + e_3) = \sin(\beta_o) / \sin(\beta_o + \delta)$                                                                                                      | Divide (16) by (1)                      | Minimum principal stretch                                     |
| (19) $(1 + e_2) = 1.0$                                                                                                                                                   | See assumption 2                        | Intermediate principal stretch                                |
| (20) $(1 + e_1) = \sin(\beta_o + \delta) / \sin(\beta_o)$                                                                                                                | See assumption 3                        | Maximum principal stretch (vertical)                          |
| (21) $(\beta_o + \delta)$                                                                                                                                                | See Fig. E                              | Angle of strike-perpendicular line from X direction of strain |
| (22) Stretch of strike-perpendicular line:<br>$= 1 / [\{\sin((\beta_o + \delta) / \sin(\beta_o))\}^2 \times \sin^2(\beta_o + \delta) + \cos^2(\beta_o + \delta)]^{-1/2}$ |                                         | From Ramsay and Huber (1983), p. xx.                          |
| (23) $SS^* = D \cos \alpha + [\tan\{90 - (\beta_o + \delta)\} \times (-1) \times \text{Heave}]$                                                                          | See Figs. D & E (insert Eqns 9, 11, 13) |                                                               |
