# Supplementary material
Source: publisher figshare collection journal article supplement (https://gsapubs.figshare.com/articles/dataset/_/14143943)
Supplement: Supplementary file 3 [file 1]

# Supplemental Material S3A (Area A, Transect 1)

A) Uninterpreted Orthophotograph

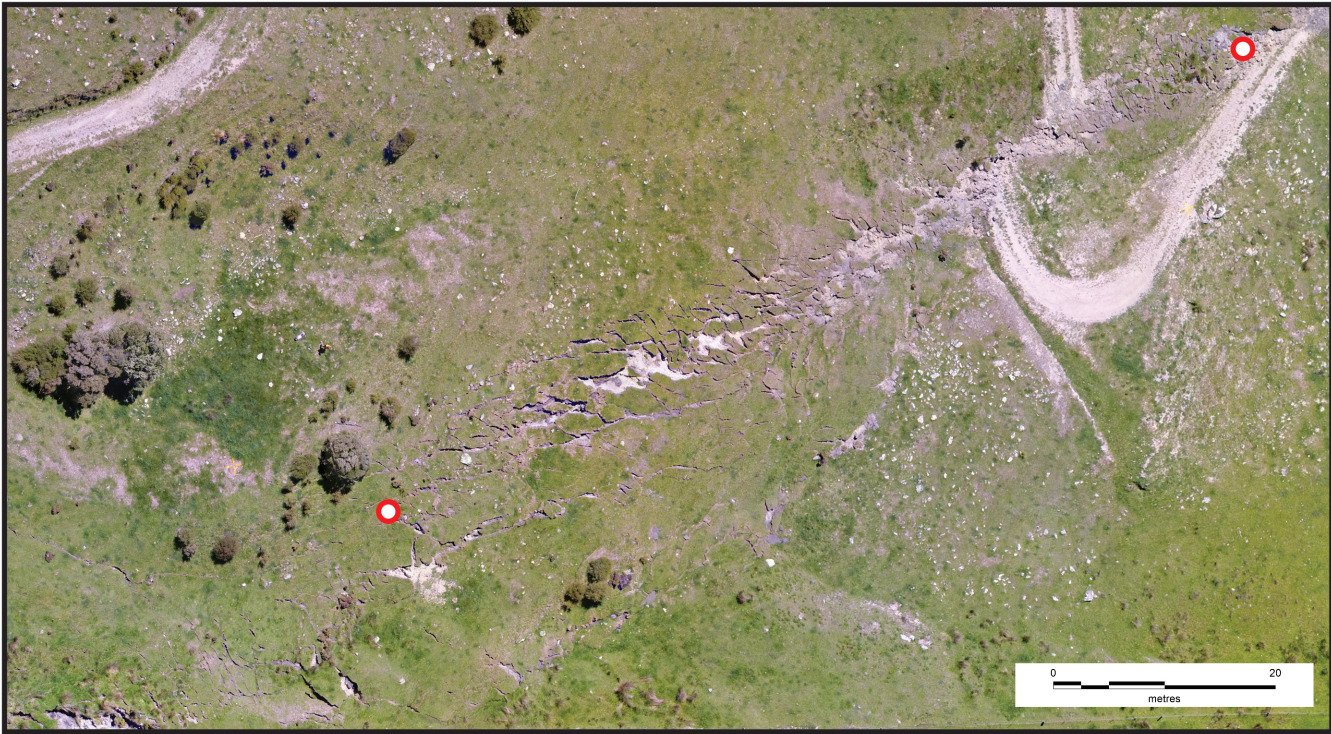

B) Interpreted Orthophotograph

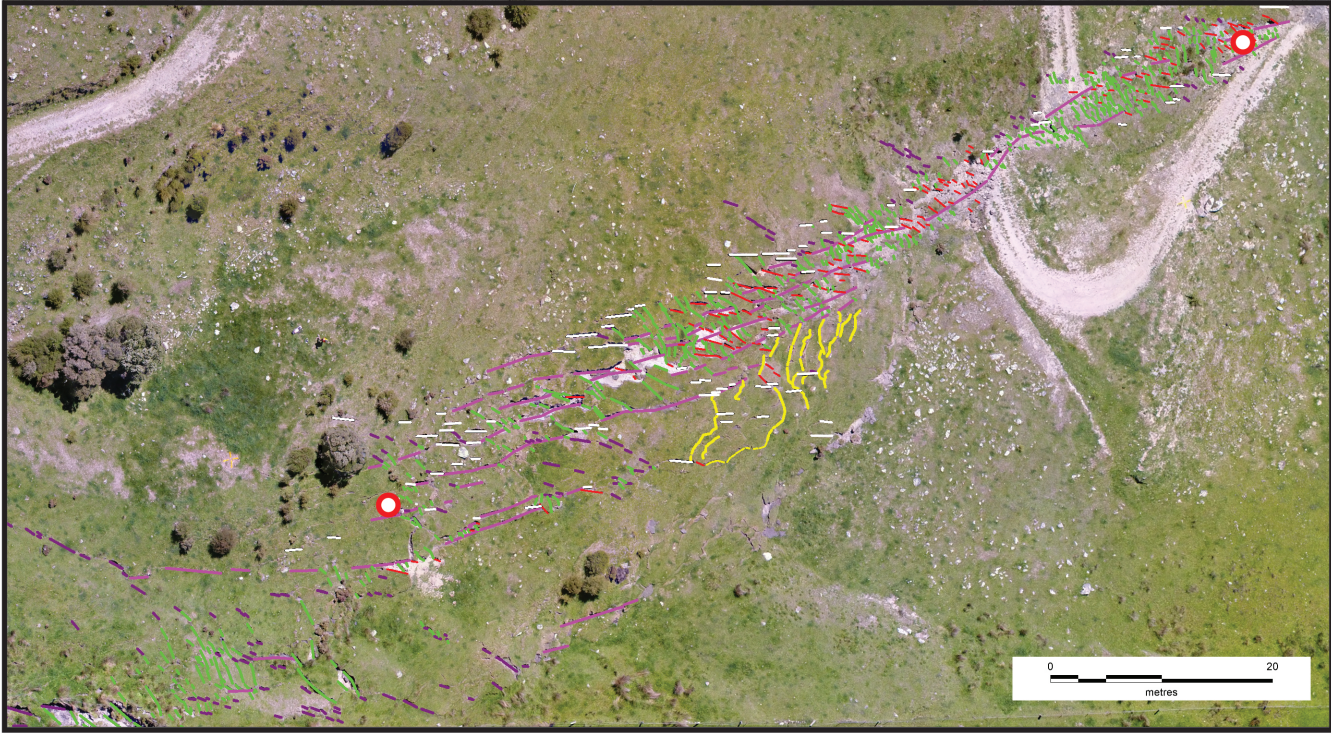

C) Interpretation Only

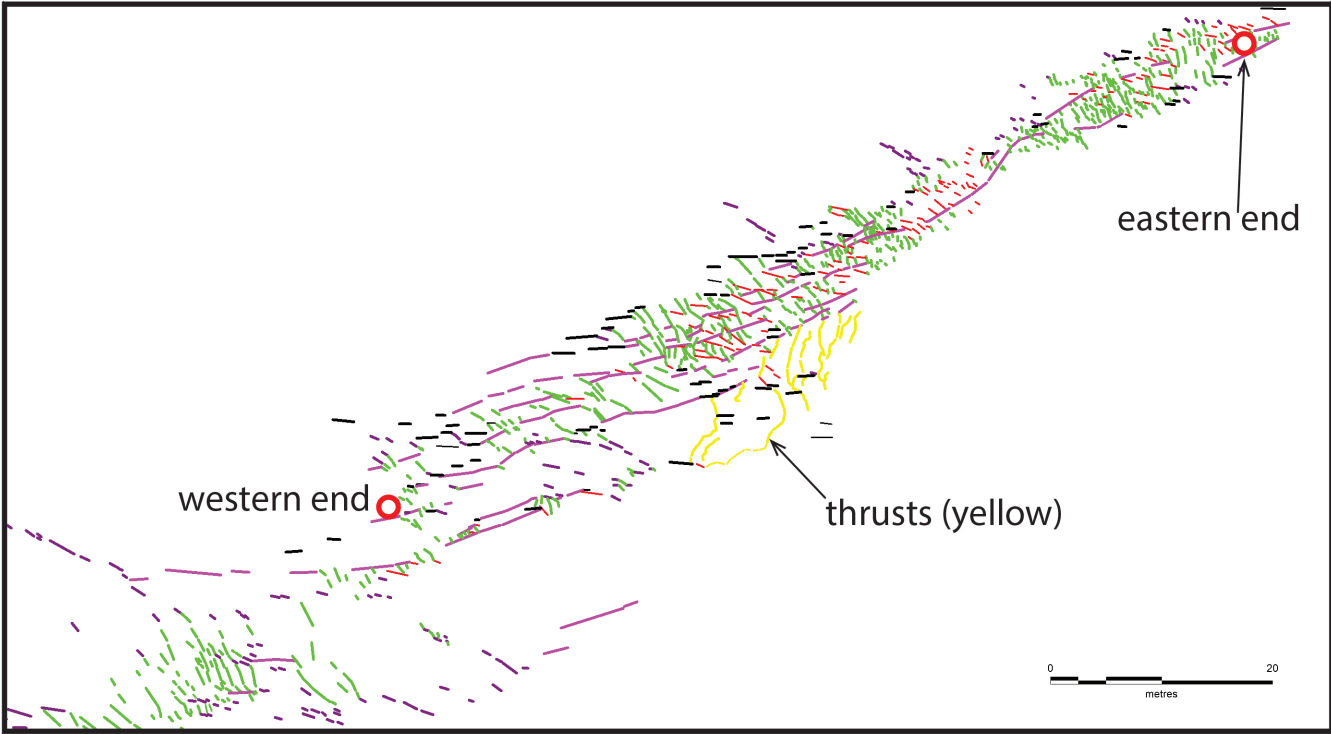

## Explanation

-  Transect end point (See Table 2 for coordinates)
-  Synthetic R fault (interpreted as unrotated, shown white in part B)
-  Extension fissure (F, interpreted as little rotated)
-  Deformed R fault (interpreted as CW-rotated)
-  Secondary fracture ("2")—primary extension fissure and/or antithetic Riedel fault. (now with sinistral offset and opening, and interpreted as CW-rotated)
-  Dextral-slip fault (Y, subparallel to main strike of rupture); may include "calving scars"



# Supplemental Material S3B (Area A, Transect 2)

A) Uninterpreted Orthophotograph

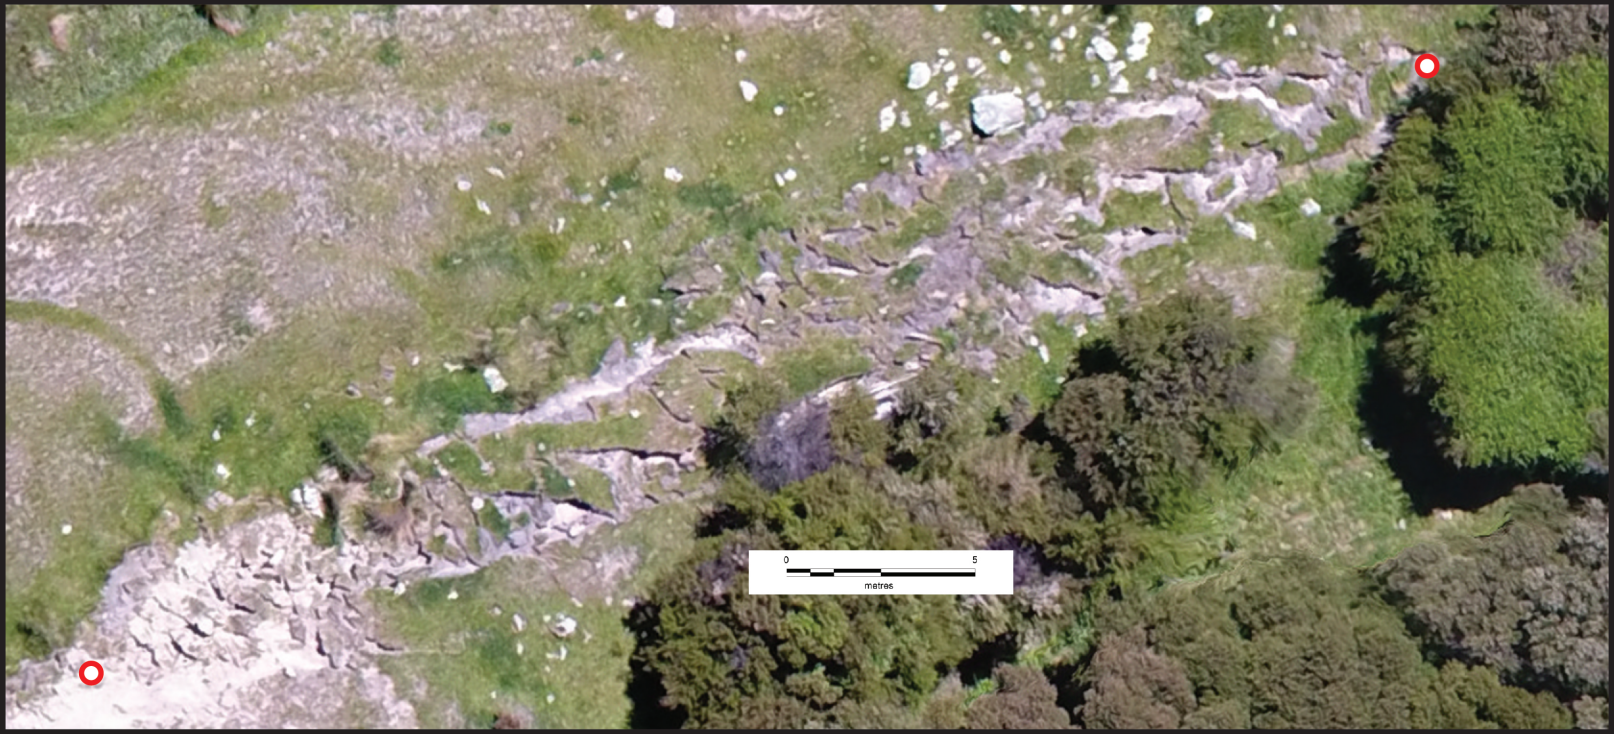

B) Interpreted Orthophotograph

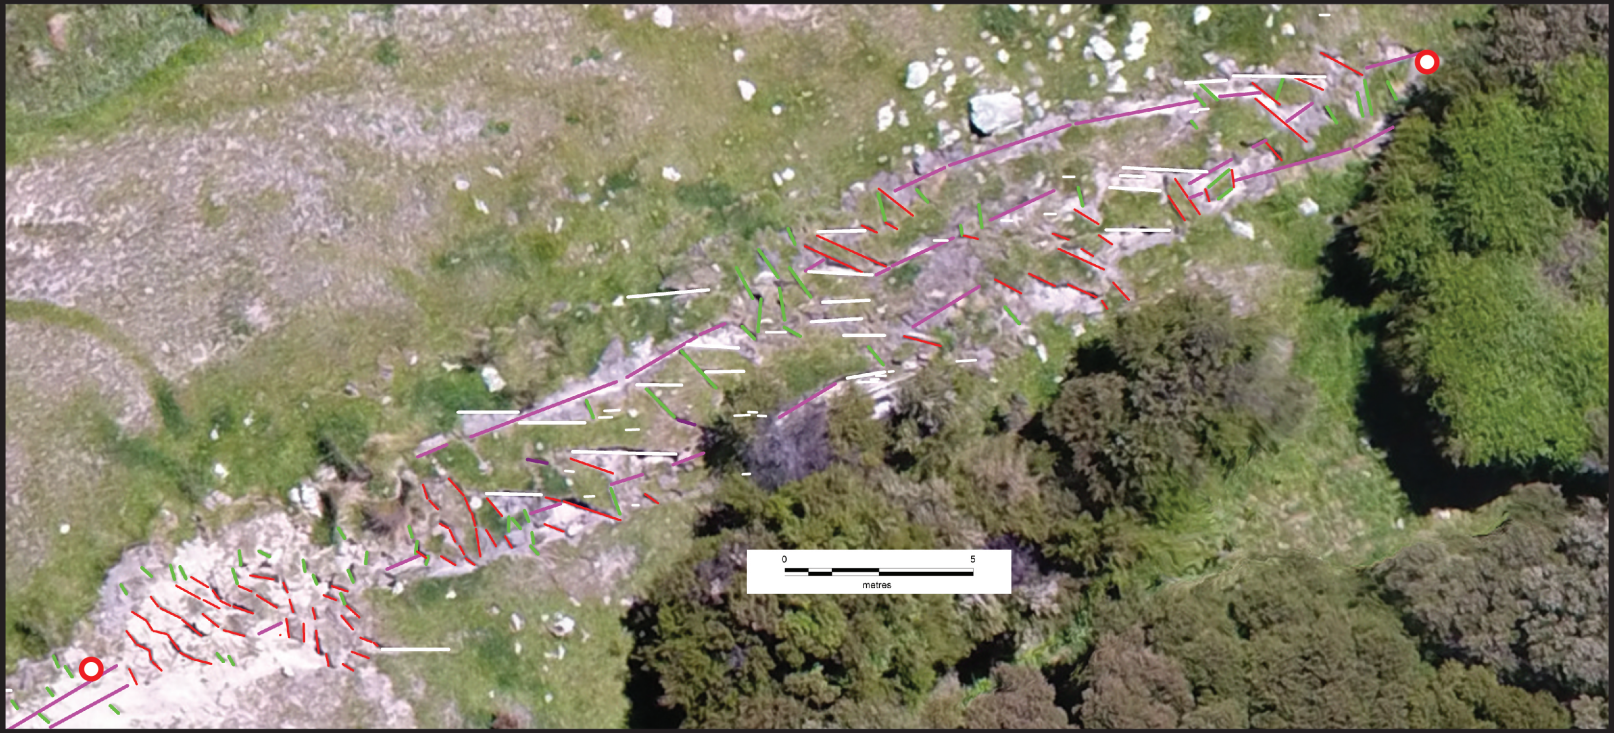

C) Interpretation Only

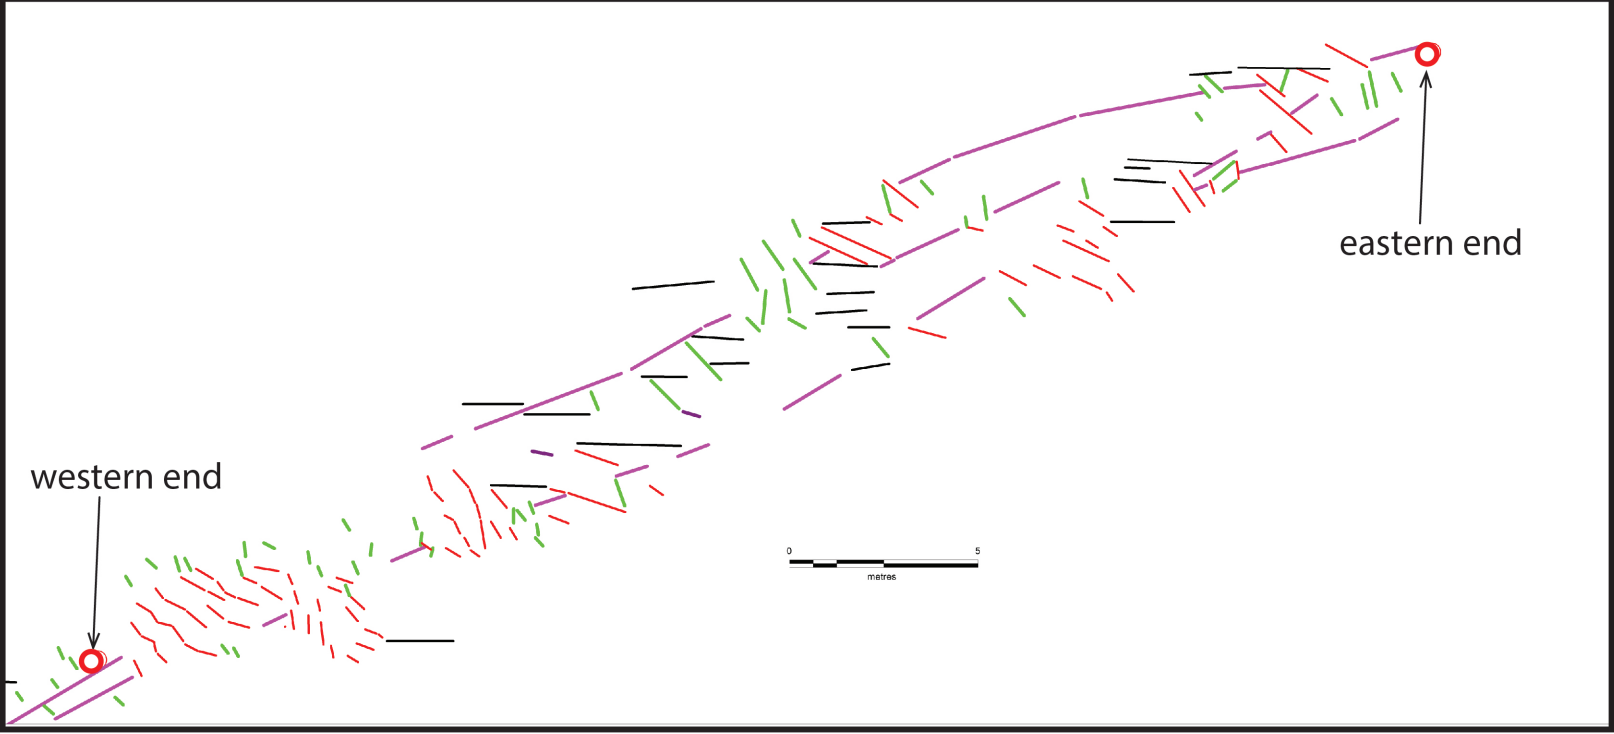

## Explanation

-  Transect end point (see Table 2 for coordinates)
-  Synthetic R fault (interpreted as unrotated, shown white in part B)
-  Extension fissure (F, interpreted as little rotated)
-  Deformed R fault (interpreted as CW-rotated)
-  Secondary fracture ("2")—primary extension fissure and/or antithetic Riedel fault. (now with sinistral offset and opening, and interpreted as CW-rotated)
-  Dextral-slip fault (Y, subparallel to main strike of rupture); may include "calving scars"



# Supplemental Material S3C (Area C, Transect 1)

A) Uninterpreted Orthophotograph

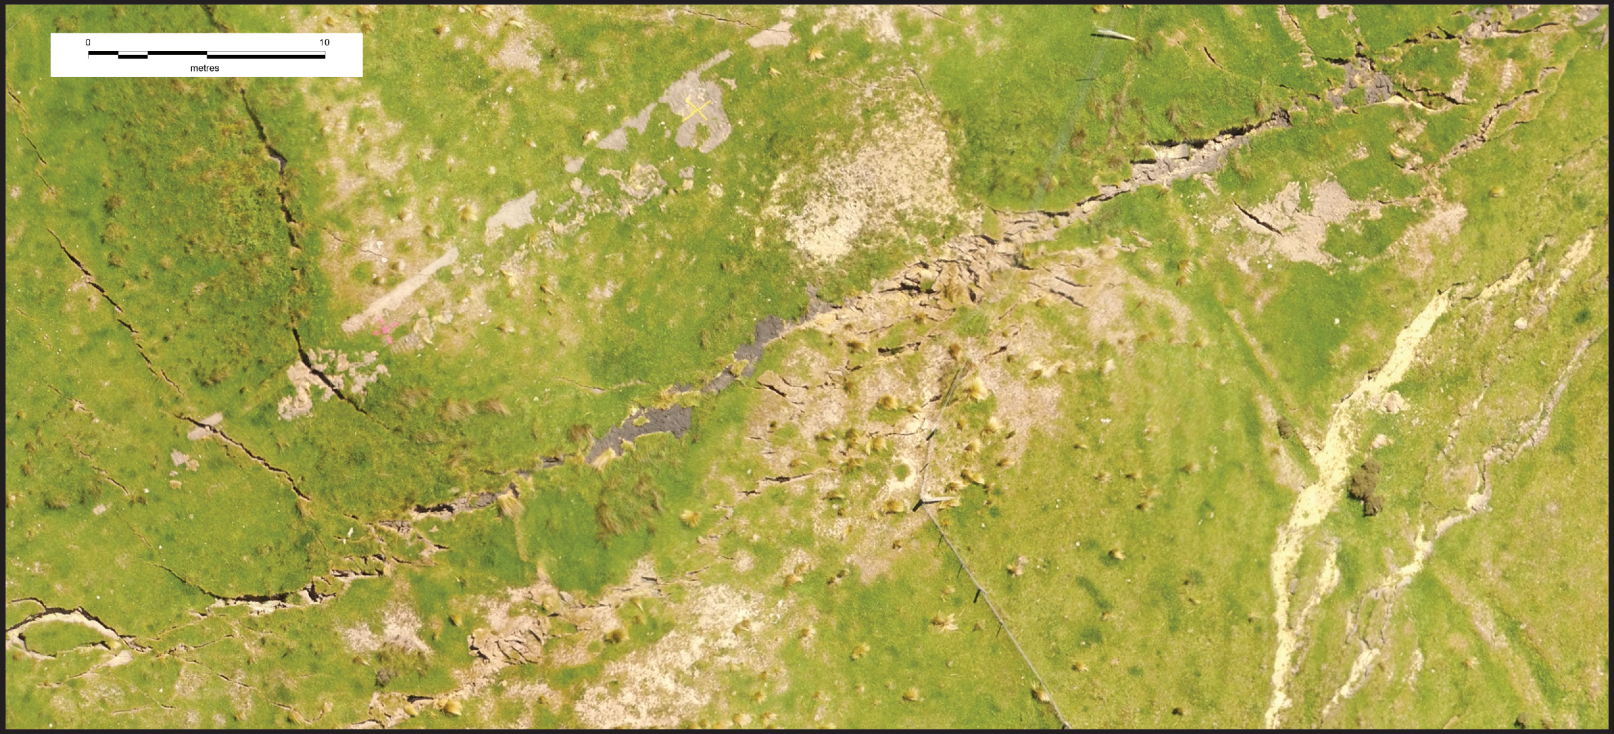

B) Interpreted Orthophotograph

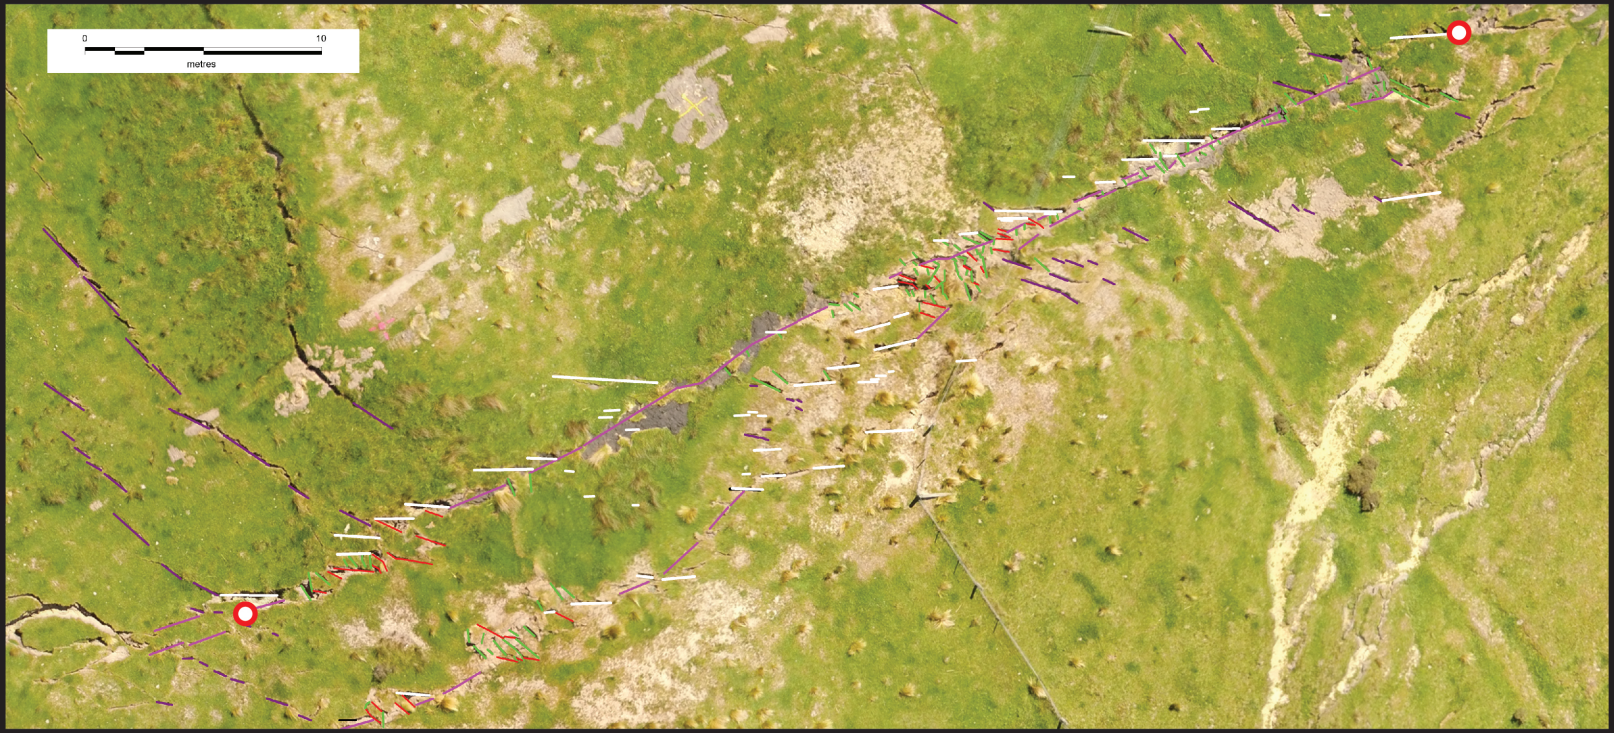

C) Interpretation Only

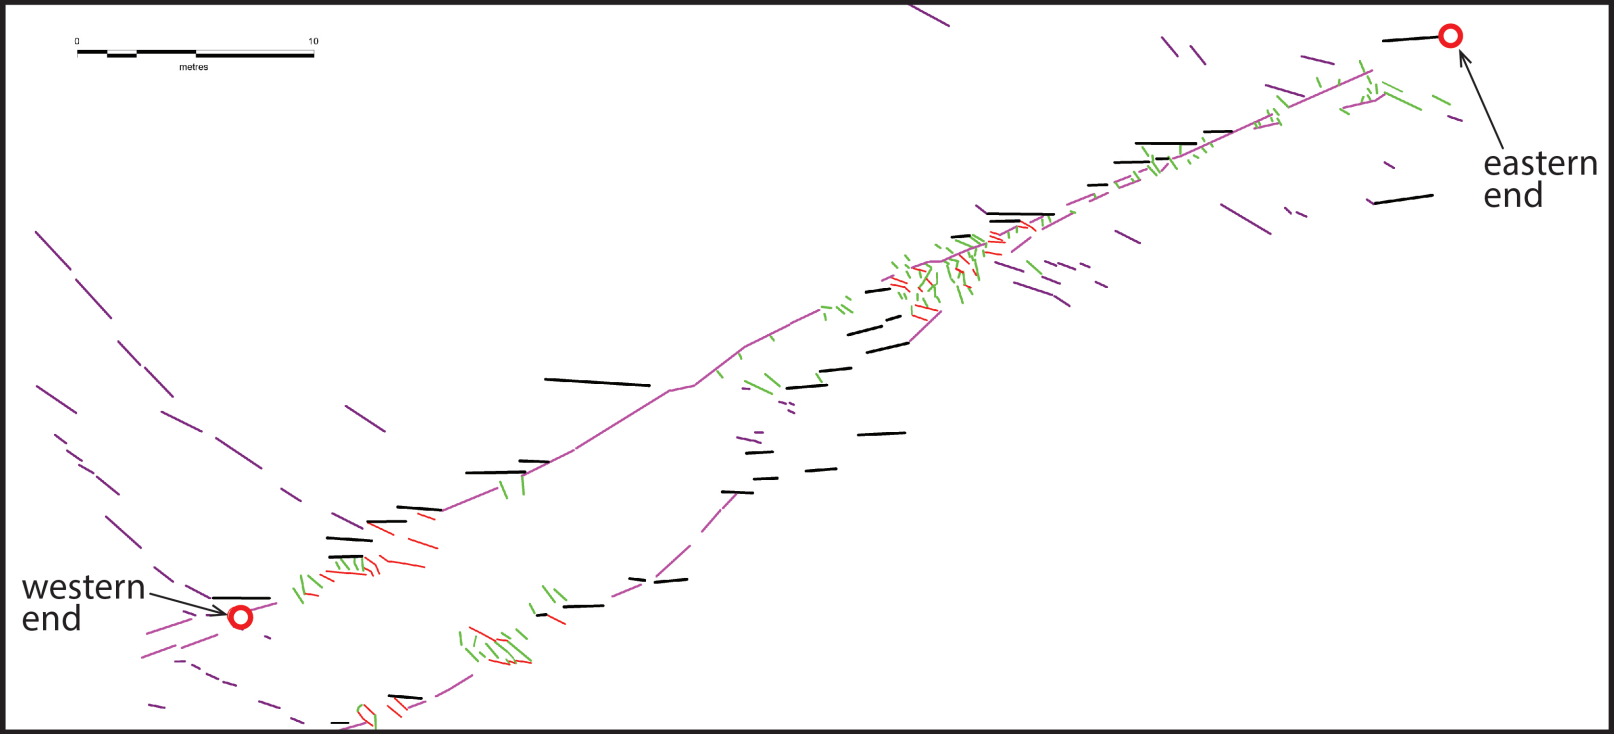

## Explanation

-  Transect end point (see Table 2 for coordinates)
-  Synthetic R fault (interpreted as unrotated, shown white in part B)
-  Extension fissure (F, interpreted as little rotated)
-  Deformed R fault (interpreted as CW-rotated)
-  Secondary fracture ("2")—primary extension fissure and/or antithetic Riedel fault. (now with sinistral offset and opening, and interpreted as CW-rotated)
-  Dextral-slip fault (Y, subparallel to main strike of rupture); may include "calving scars"



# Supplemental Material S3D (Area C, Transect 2)

A) Uninterpreted Orthophotograph

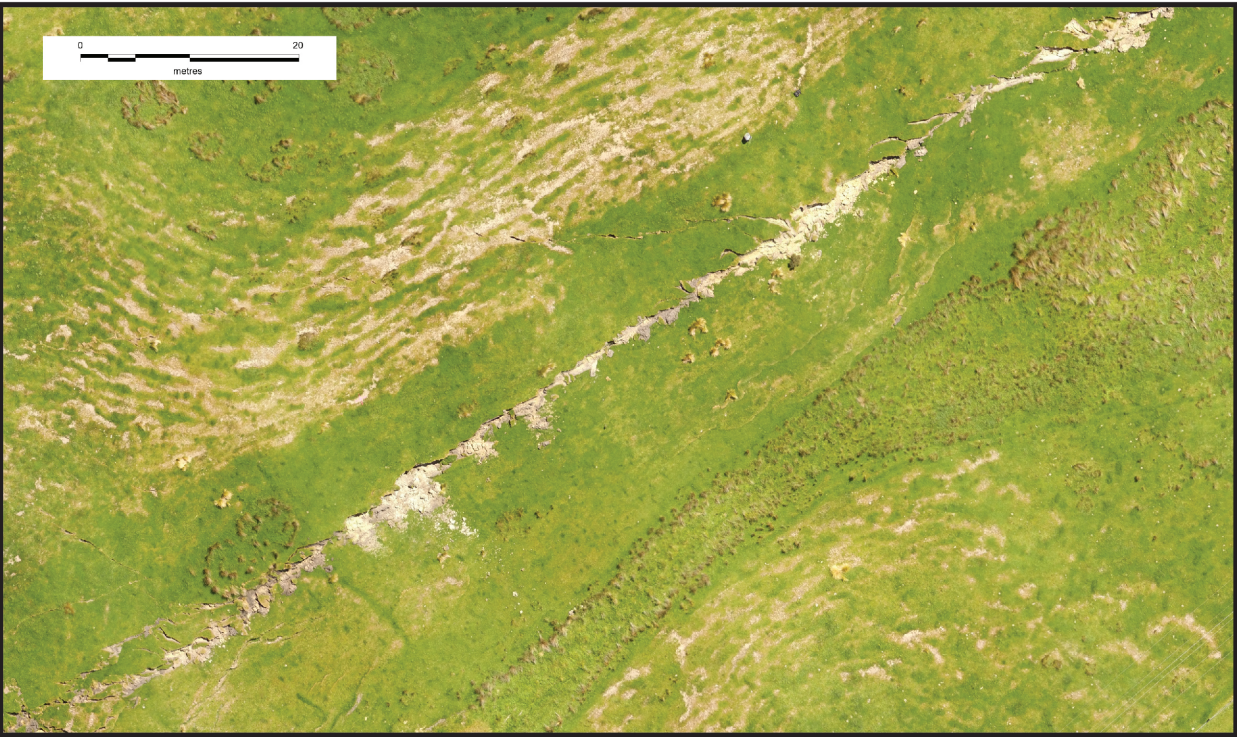

B) Interpreted Orthophotograph

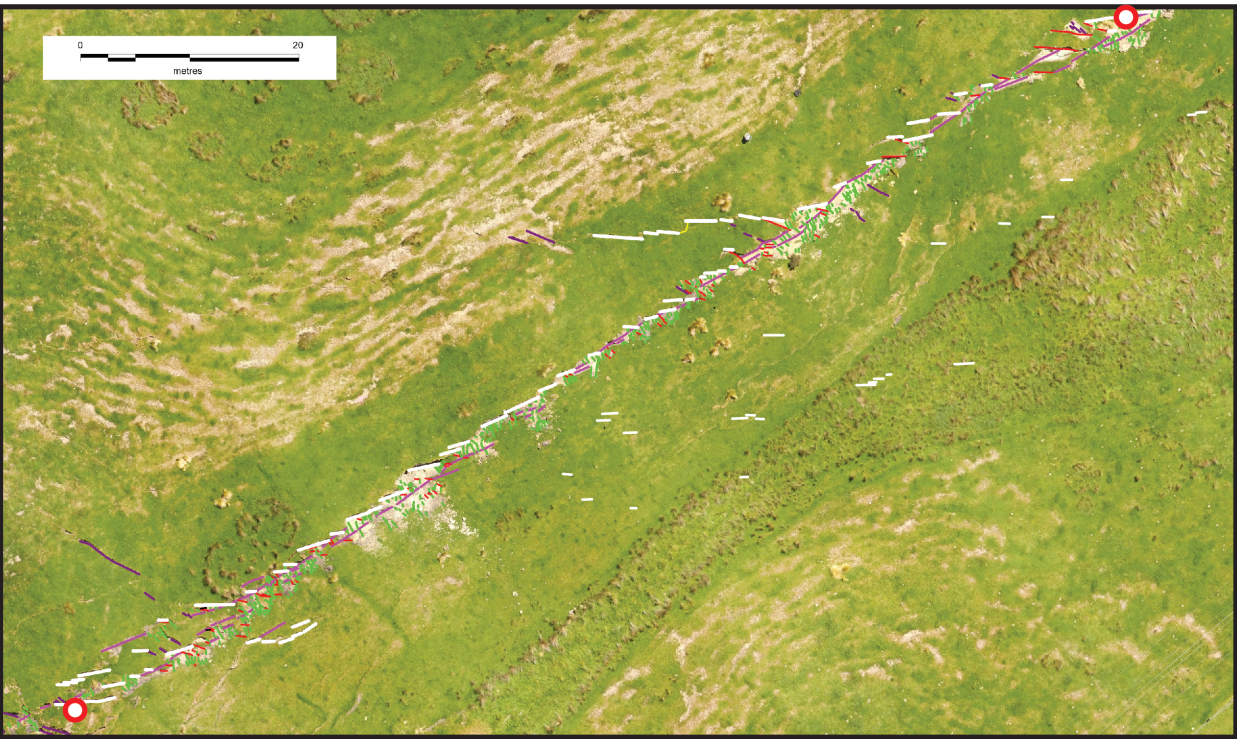

C) Interpretation Only

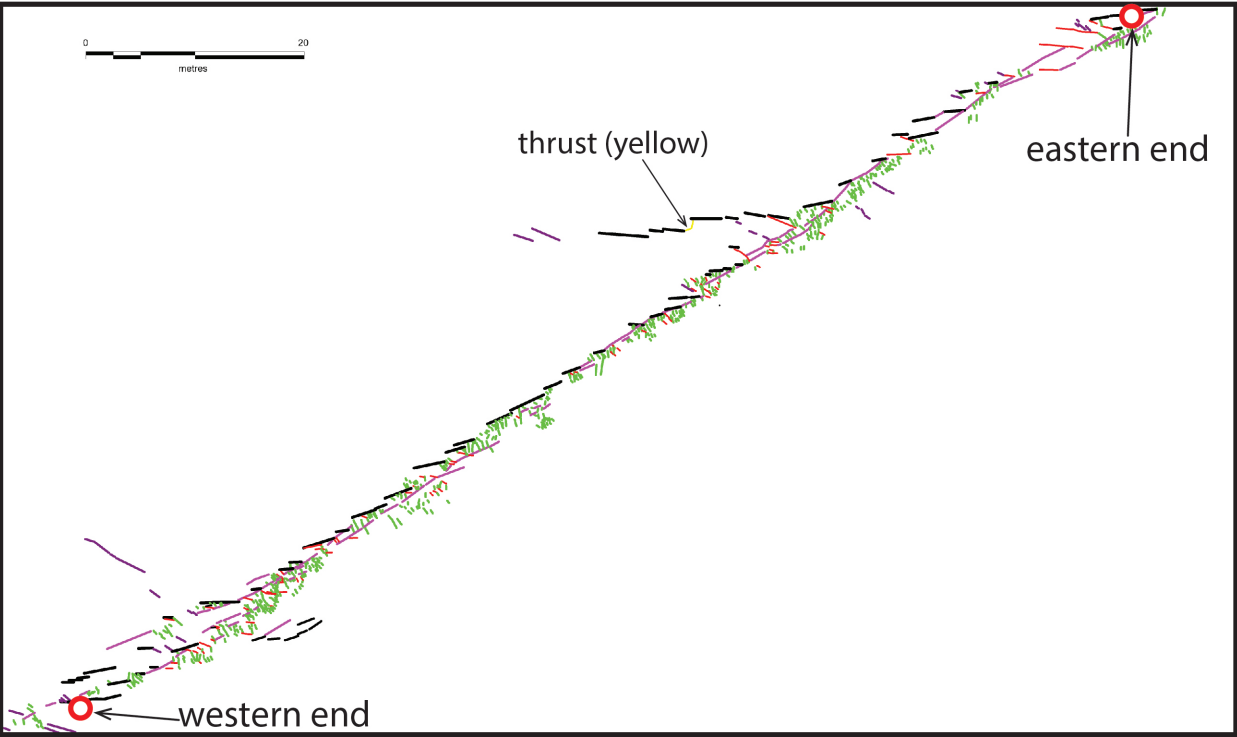

## Explanation

- Transect end point (see Table 2 for coordinates)
- Synthetic R fault (interpreted as unrotated, shown white in part B)
- Extension fissure (F, interpreted as little rotated)
- Deformed R fault (interpreted as CW-rotated)
- Secondary fracture ("2")—primary extension fissure and/or antithetic Riedel fault. (now with sinistral offset and opening, and interpreted as CW-rotated)
- Dextral-slip fault (Y, subparallel to main strike of rupture); may include "calving scars"



# Supplemental Material S3E (Area C, Transect 3)

A) Uninterpreted Orthophotograph

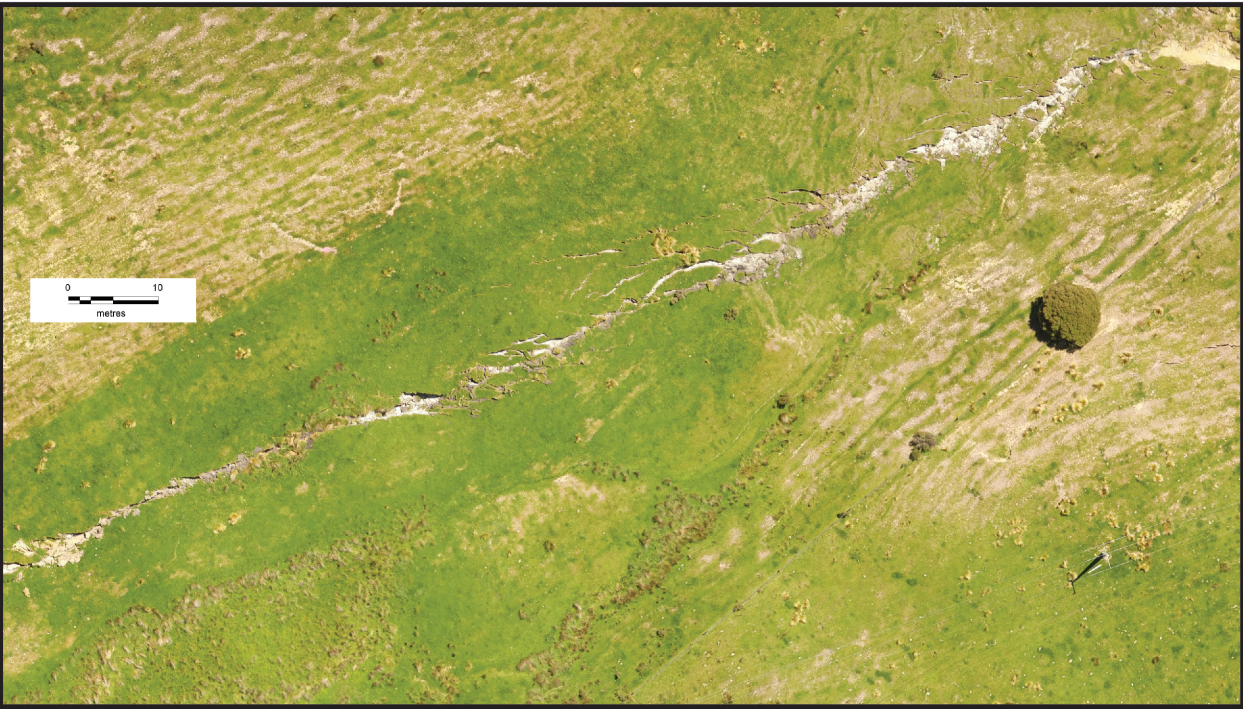

B) Interpreted Orthophotograph

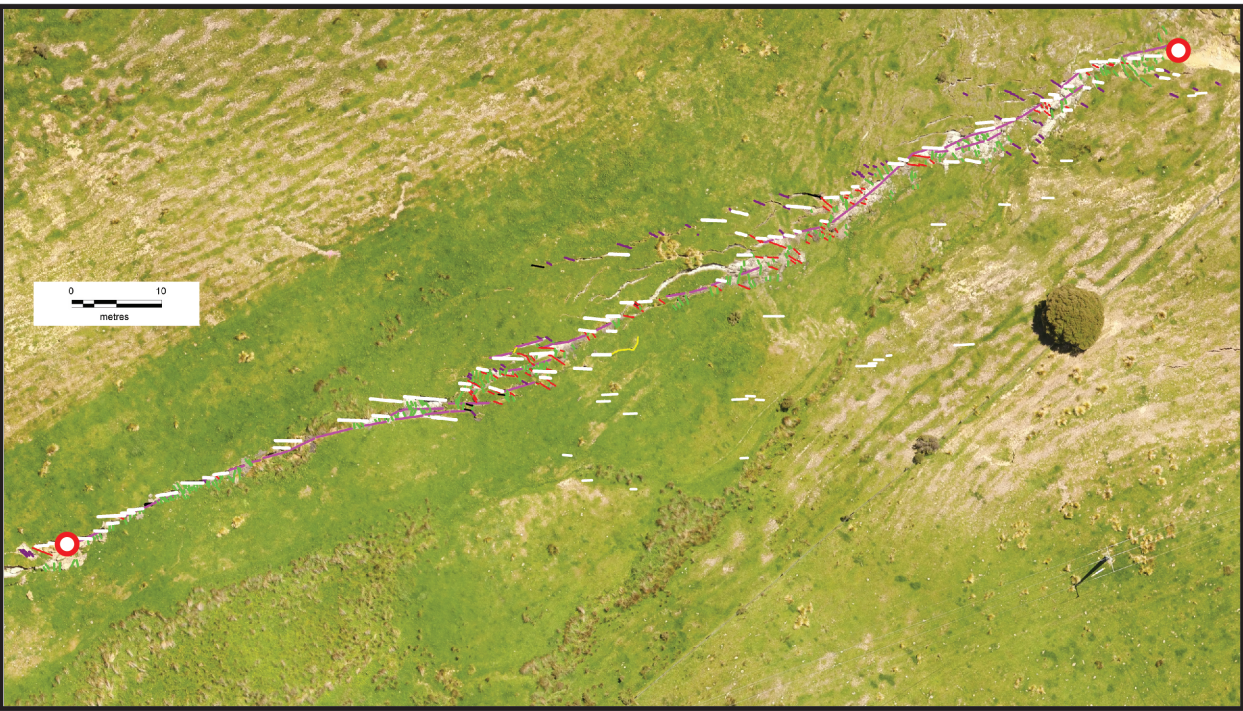

C) Interpretation Only

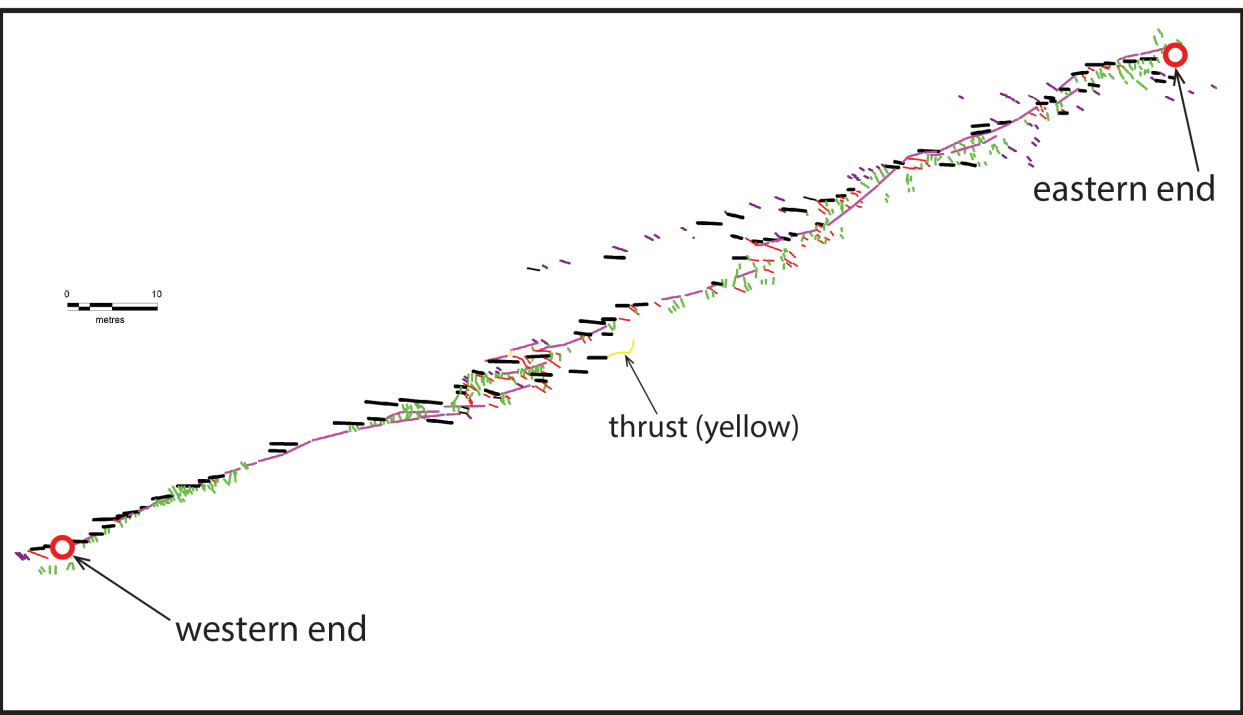

## Explanation

- Transect end point (see Table 2 for coordinates)
- Synthetic R fault (interpreted as unrotated, shown white in part B)
- Extension fissure (F, interpreted as little rotated)
- Deformed R fault (interpreted as CW-rotated)
- Secondary fracture ("2")—primary extension fissure and/or antithetic Riedel fault. (now with sinistral offset and opening, and interpreted as CW-rotated)
- Dextral-slip fault (Y, subparallel to main strike of rupture); may include "calving scars"



# Supplemental Material S3F (Area C, Transect 4)

A) Uninterpreted Orthophotograph

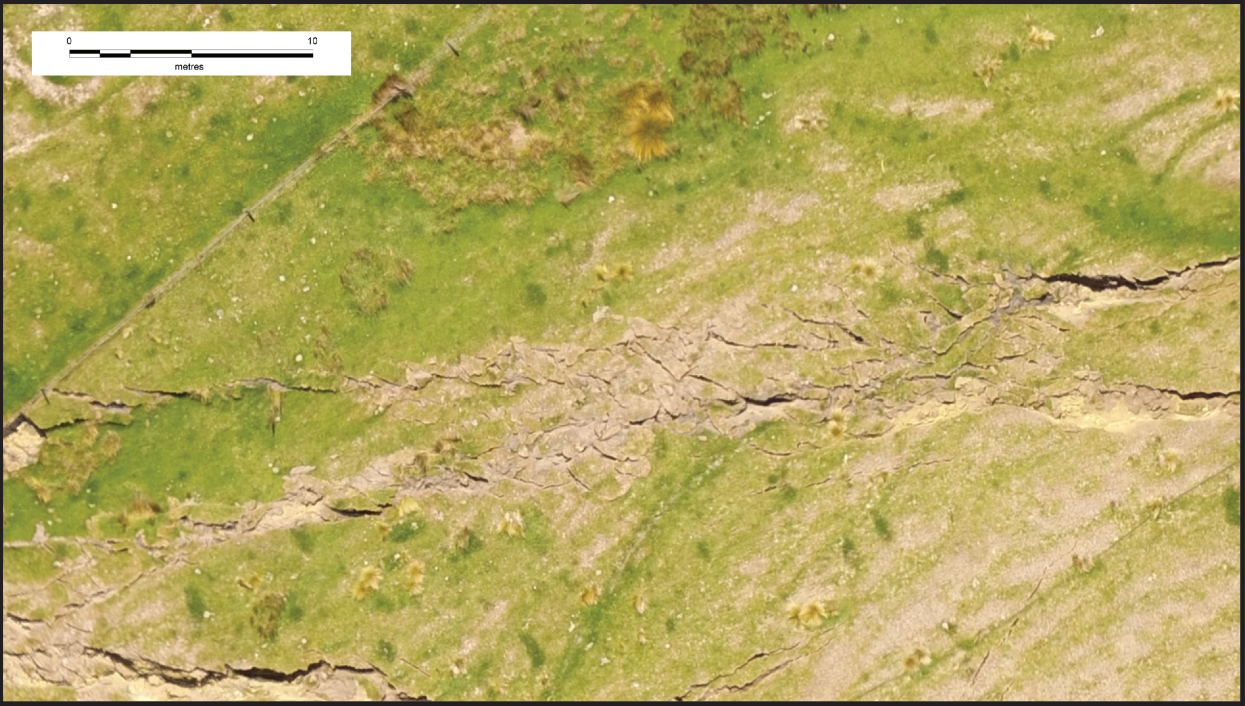

B) Interpreted Orthophotograph

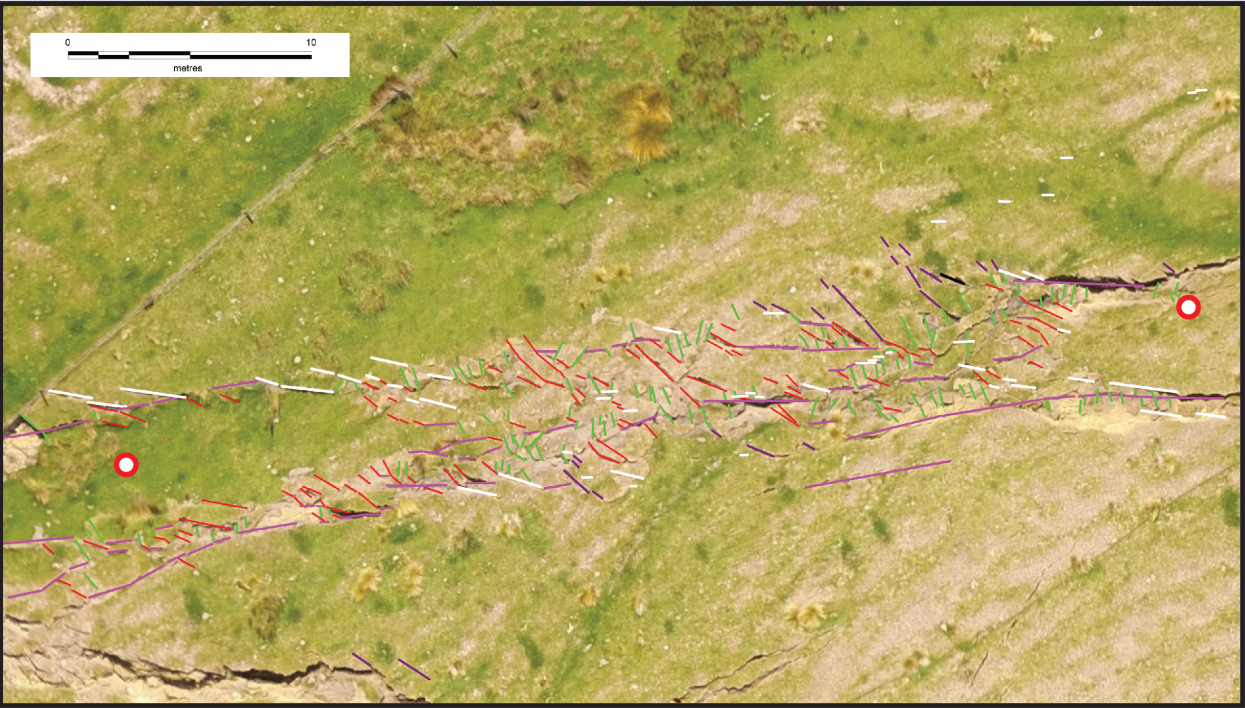

C) Interpretation Only

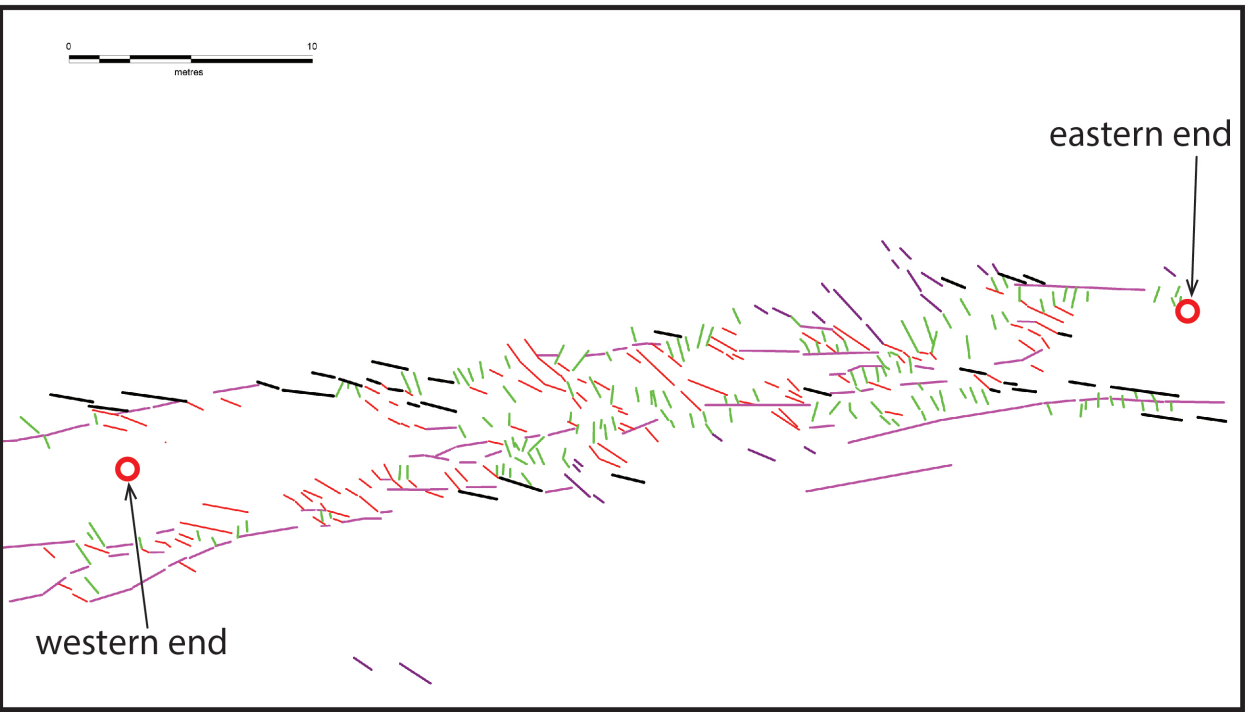

## Explanation

- Transect end point (see Table 2 for coordinates)
- Synthetic R fault (interpreted as unrotated, shown white in part B)
- Extension fissure (F, interpreted as little rotated)
- Deformed R fault (interpreted as CW-rotated)
- Secondary fracture ("2")—primary extension fissure and/or antithetic Riedel fault. (now with sinistral offset and opening, and interpreted as CW-rotated)
- Dextral-slip fault (Y, subparallel to main strike of rupture); may include "calving scars"



# Supplemental Material S3G (Area D, Transect 1)

A) Uninterpreted Orthophotograph

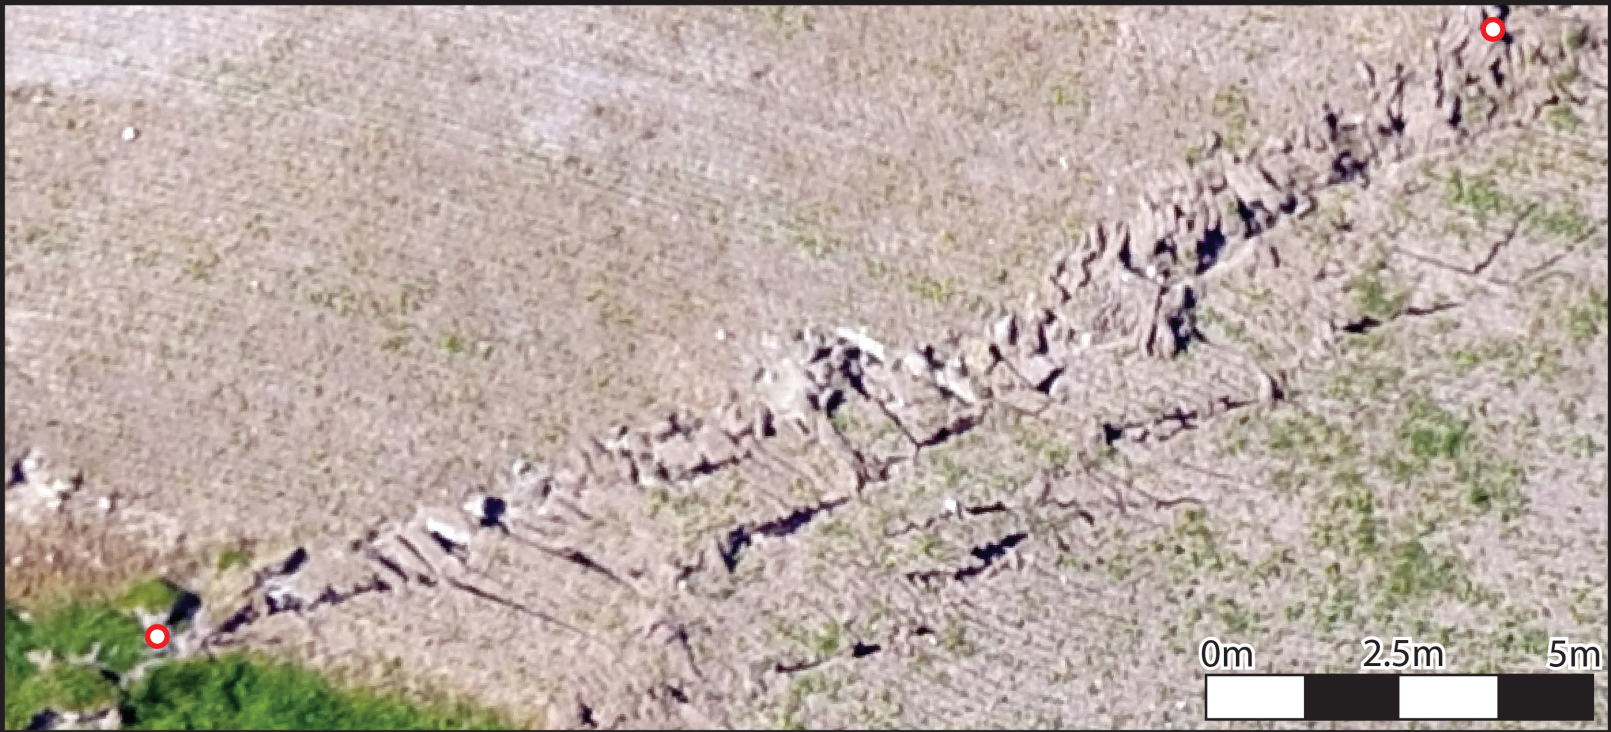

B) Interpreted Orthophotograph

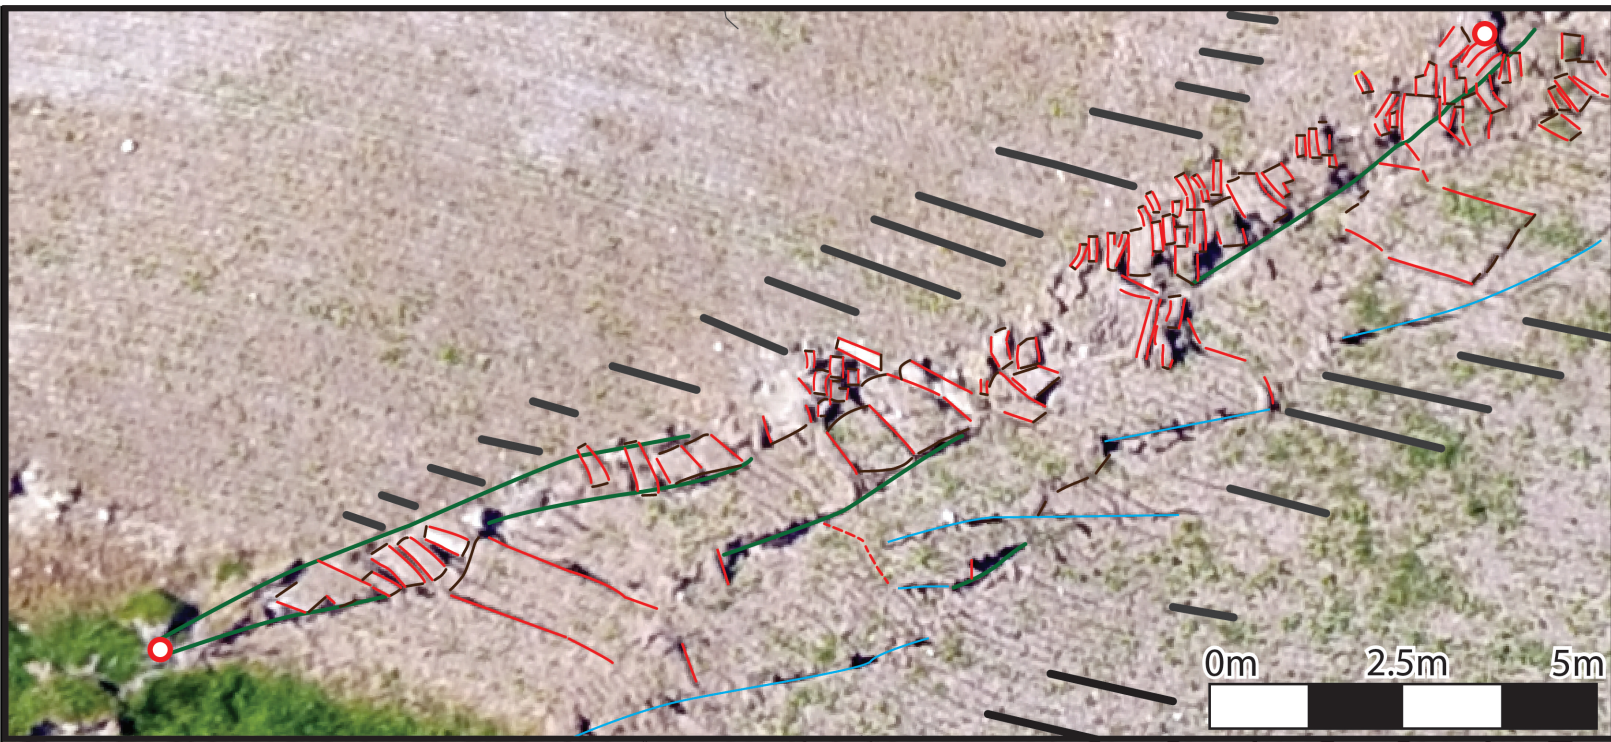

C) Interpretation Only

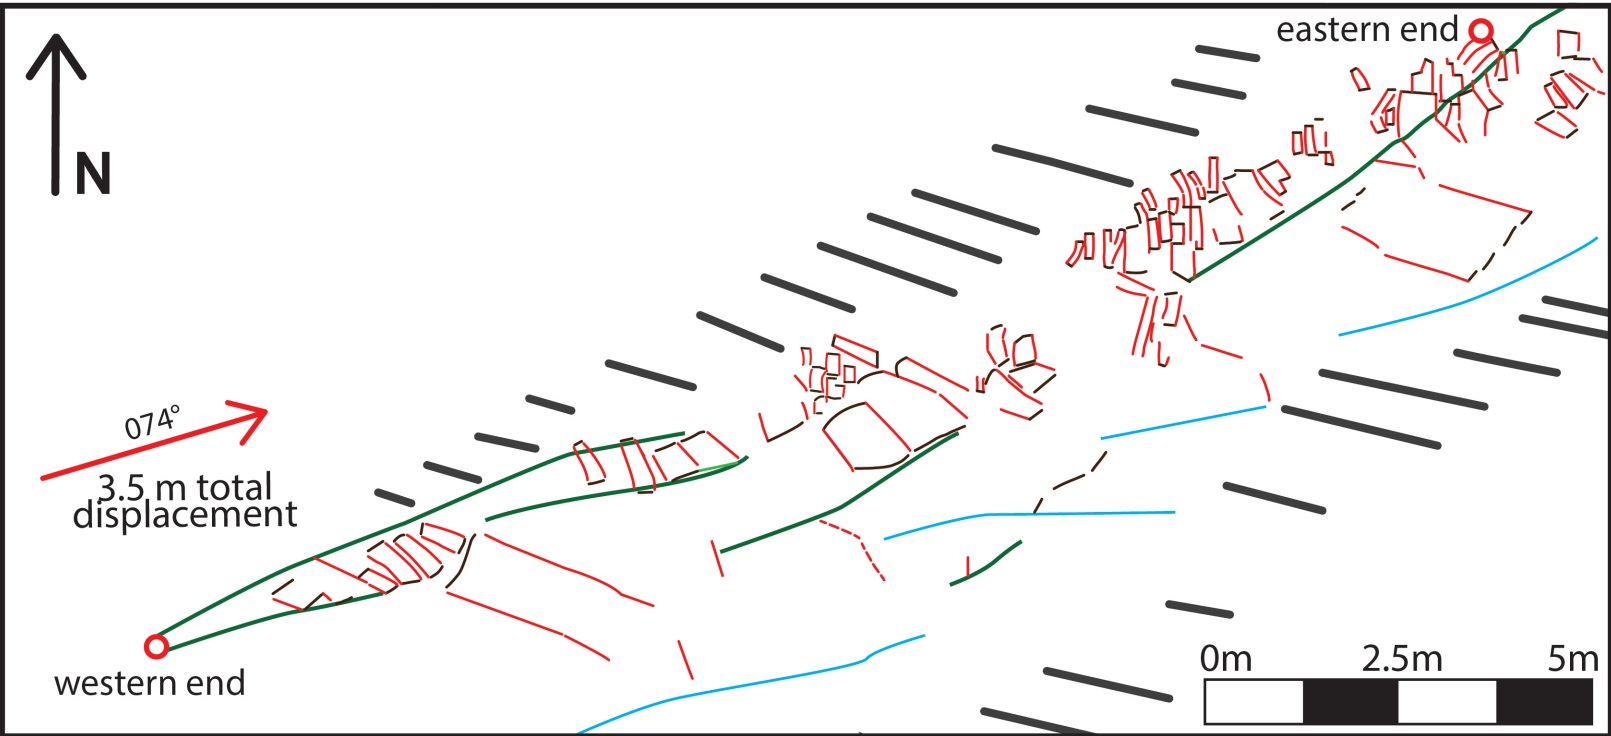

## Explanation

- Transect end point
- Anthropogenic cuts in the ground made by farmer's plough prior to the earthquake (interpreted as unrotated from original)
- Deformed, CW-rotated plough cuts
- Torn ends of plough-cut rafts
- Dextral-slip fault, forming at a small acute angle to the main fault trace (= Riedel fault)
- Dextral-slip fault (Y fault, subparallel to main strike of fault trace)
